# Supplementary material for: Key Process and Factors Controlling the Direct Translocation of Cell-Penetrating Peptide through Bio-Membrane
Source: Int J Mol Sci. 2020 Jul 30;21(15):5466. doi: 10.3390/ijms21155466 (PMC7432884; doi:10.3390/ijms21155466)

Suppl. Figure 1

(a)

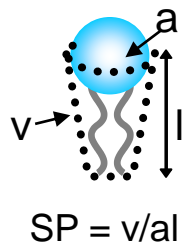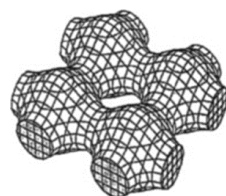

tetragonal mesh phase

(b)

$L\alpha$   
 $SP = 1$

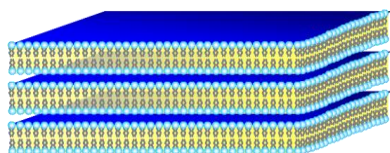

(c)

$Mesh_1$   
 $1/2 < SP < 2/3$

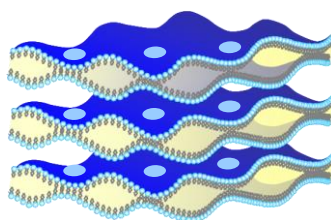

(d)

$V_1$   
 $1/2 < SP < 2/3$

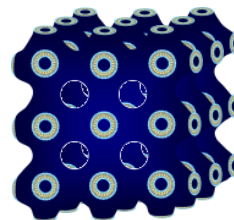

(e)

$H_1$   
 $SP = 1/2$

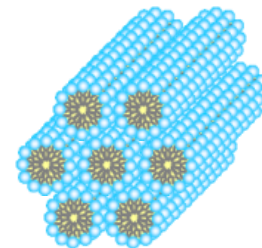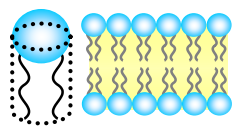

Positive curvature

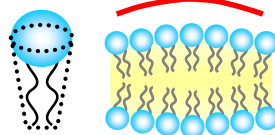

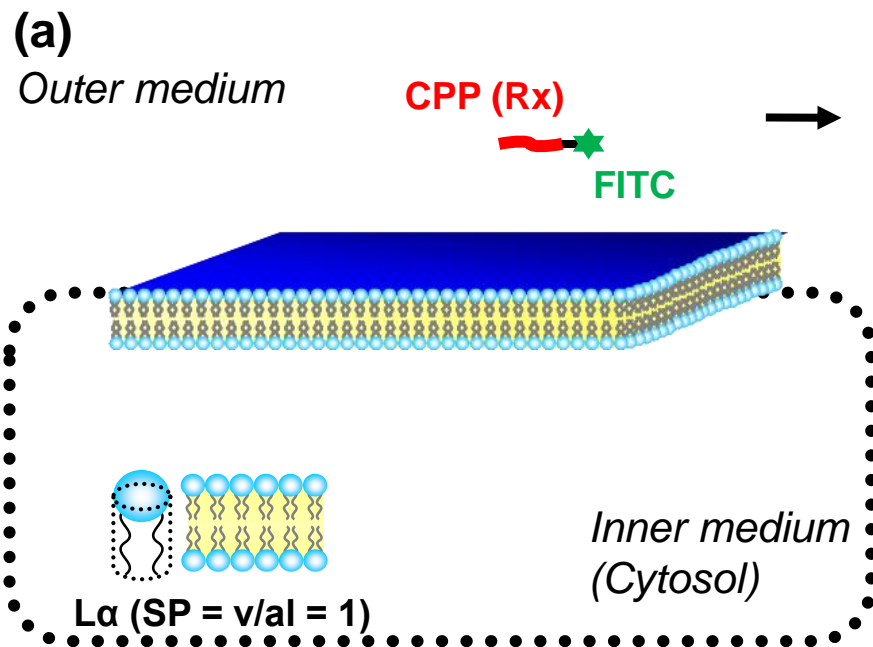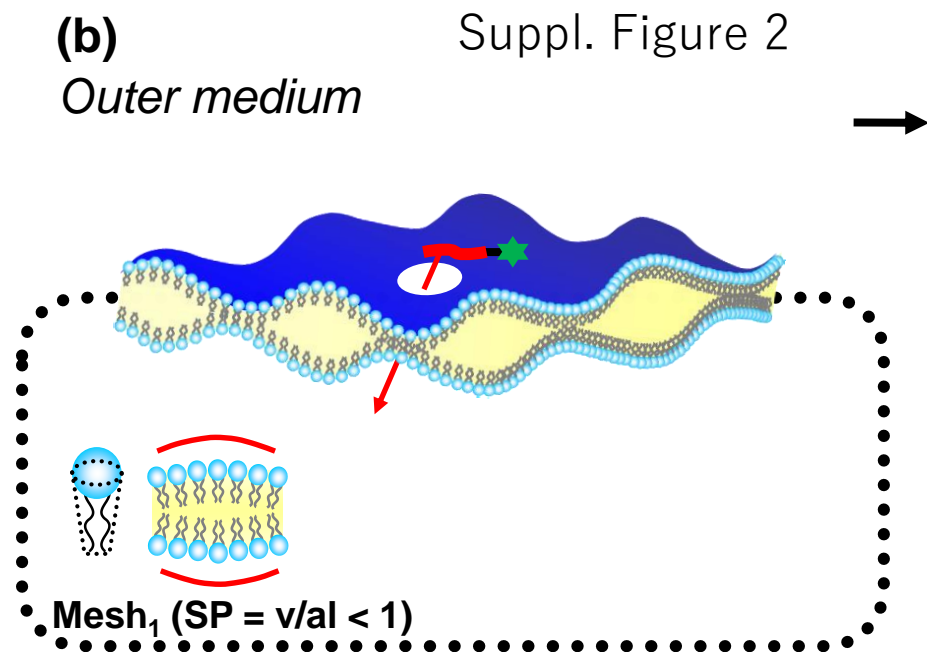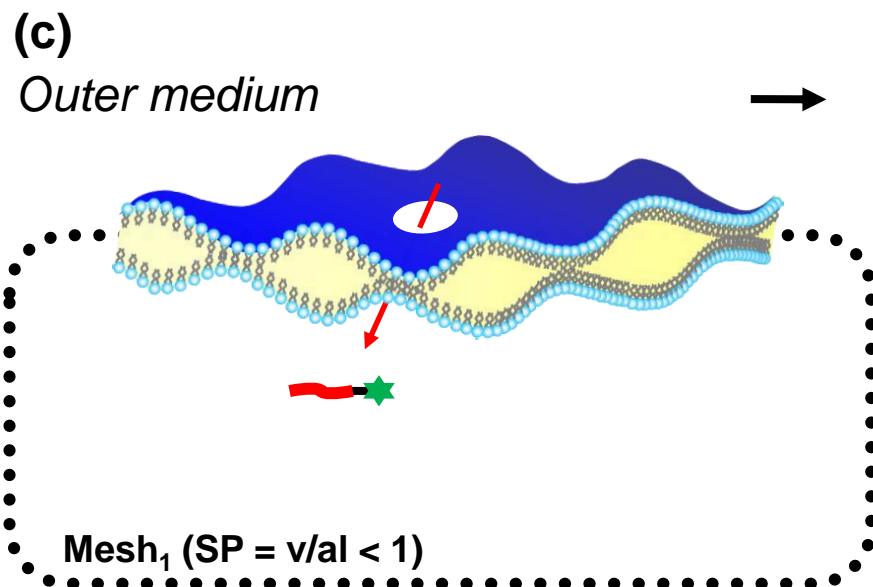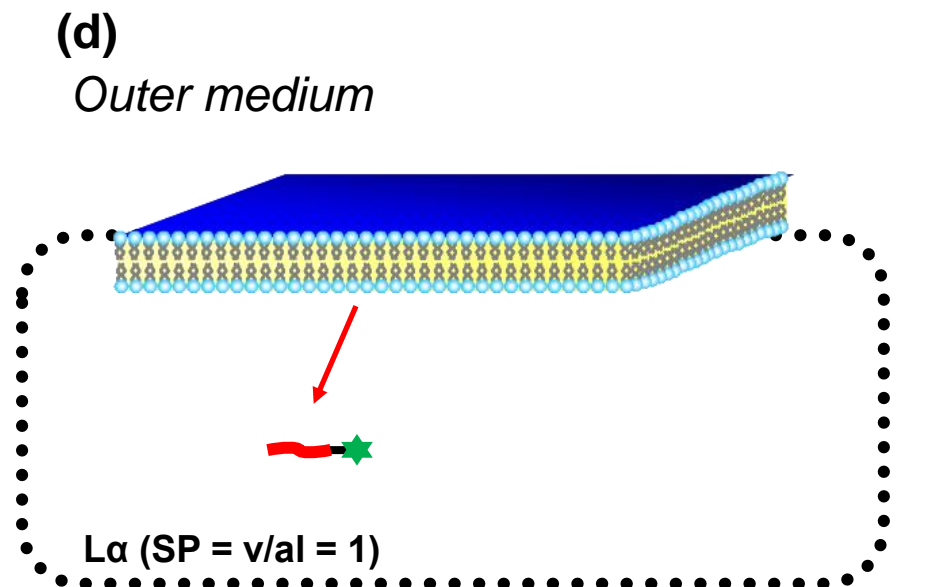

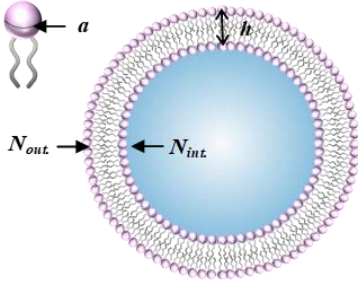

Suppl. Figure 3

The number of phospholipid molecules of the outer surface of the vesicles ( $N_{out}$ ) is represented by the formula (3).

$$N_{out} = \frac{4\pi\left(\frac{d}{2}\right)^2}{a} \quad (3)$$

The number of phospholipid molecules of the internal surface of the vesicles ( $N_{int}$ ) is represented by the formula (4).

$$N_{int} = \frac{4\pi\left(\frac{d}{2} - h\right)^2}{a} \quad (4)$$

Since the molecular occupation area  $a$  of E-PC is  $0.71\text{nm}^2$  and the thickness the bi-layer formed by the phospholipid is about  $5\text{nm}$ , the number of phospholipid molecules consisting GUV of E-PC is represented by the following formula (5).

$$N_{tot} = \frac{\left[4\pi\left(\frac{d}{2}\right)^2 + 4\pi\left(\frac{d}{2} - 5\right)^2\right]}{a} \quad (5)$$

Since the diameter of GUV is about  $14\mu\text{m}$ ,  $N_{tot}=1.7 \times 10^9$  by formulae (5),  $N_{out}=8.8 \times 10^8$  from formulae (4) and  $N_{int}=8.8 \times 10^8$  are obtained.

The number of the vesicles  $N_{vesic}$  in 1mL vesicle suspension is represented by the following formula (6).

$$N_{vesic} = \frac{M_{lipid} \times N_A}{N_{tot} \times 1000} \quad (6)$$

Wherein  $M_{lipid}$  and  $N_A$  represent molar concentration (mol/L) of the phospholipid and the Avogadro number ( $6.0 \times 10^{23}(\text{mol}^{-1})$ ), respectively.

Since the molar concentration of the phospholipid is  $1.7\text{mM}$ ,  $N_{vesi}$  is obtained by the above formula (6) as follows.

$$N_{vesi} = 5.82 \times 10^8 \text{ (unit/mL)}.$$

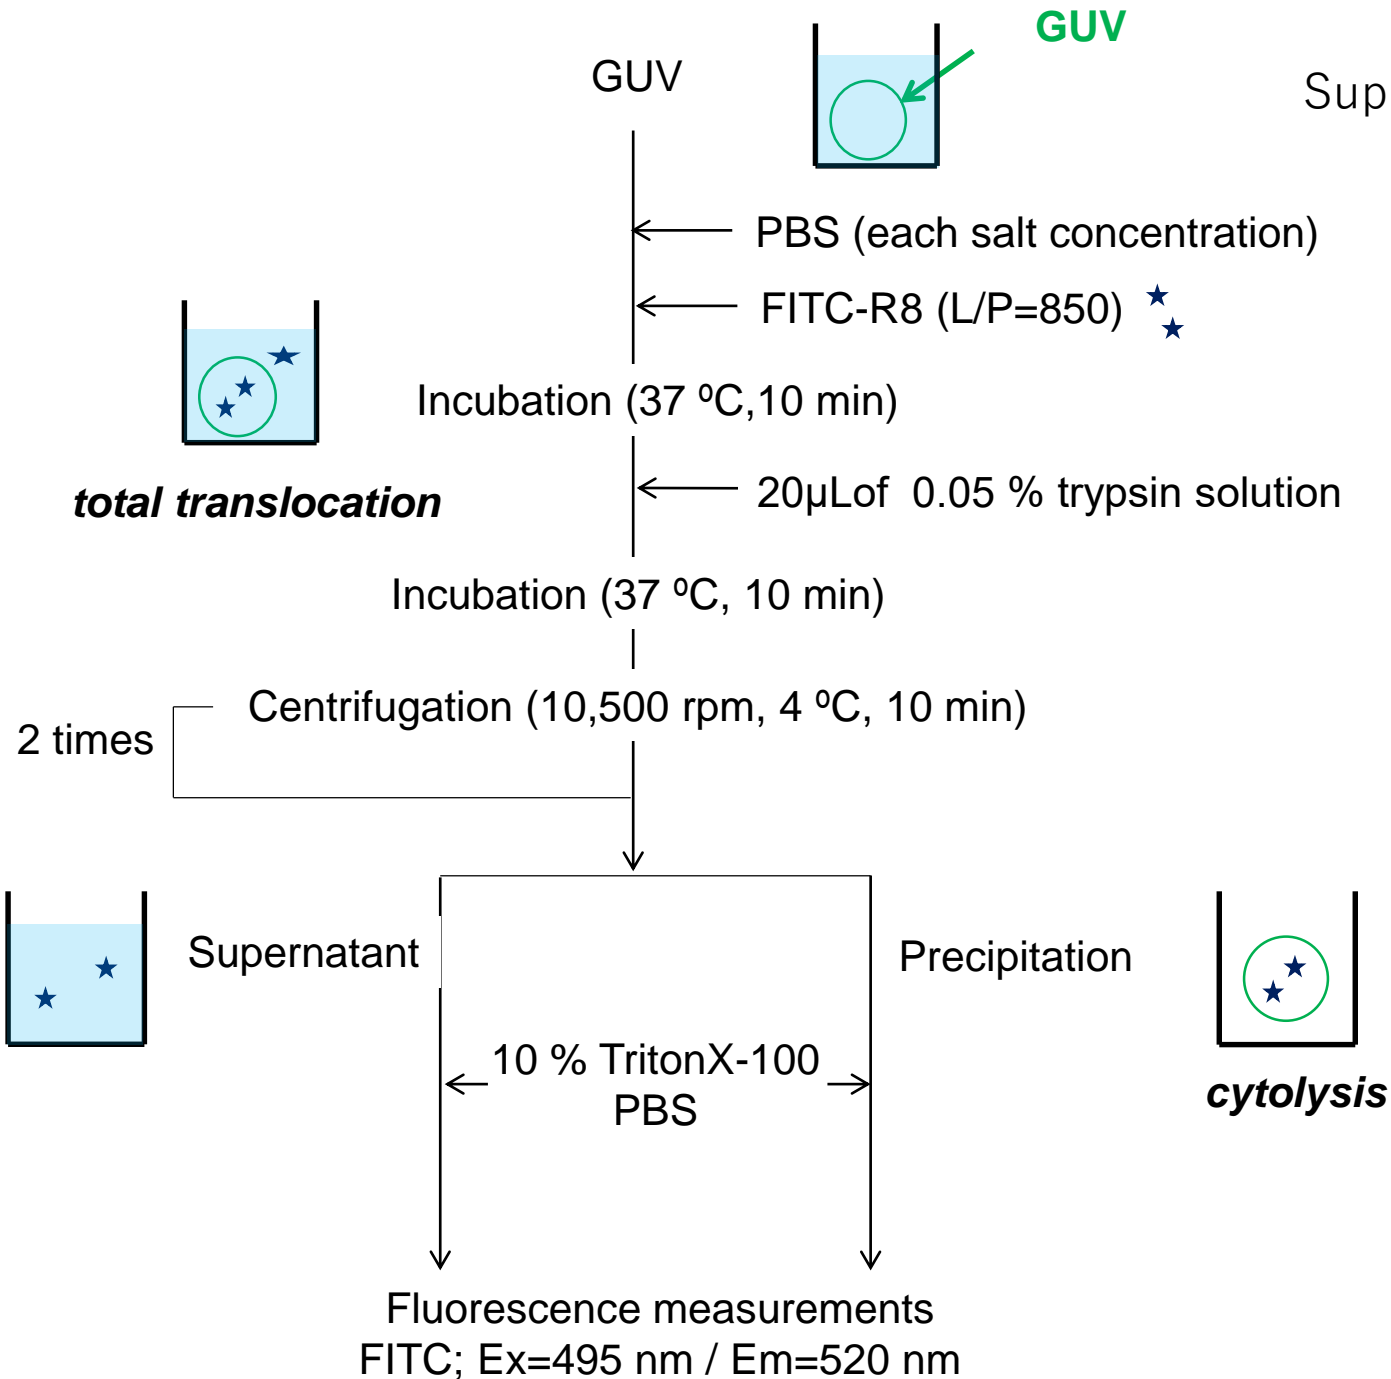

Supplement: Supplementary file 1 [file ijms-21-05466-s001.pdf]
